# Supplementary material for: Monitoring Moroccan Honeys: Physicochemical Properties and Contamination Pattern
Source: MDPI journal article supplement (doi:10.3390/foods12050969), 2023-02-24
Supplement: s1 [file s1]

## Supplementary Material

**Table S1.** Optimized MRM transitions and parameters of analytical validation for  $n=139$  organic contaminants under analysis, including pesticides ( $n=108$ ), PCBs ( $n=18$ ) and PAHs ( $n=13$ ). CE, Collision Energy;  $R^2$ , coefficient of determination; LOD, Limit of Detection; LOQ, Limit of Quantification.

| No.               | Compound                | Transition 1<br>( $m/z$ ) | CE 1<br>(V) | Transition 2<br>( $m/z$ ) | CE 2<br>(V) | $R^2$ | LOD<br>(ng/g) | LOQ<br>(ng/g) |
|-------------------|-------------------------|---------------------------|-------------|---------------------------|-------------|-------|---------------|---------------|
| <i>Pesticides</i> |                         |                           |             |                           |             |       |               |               |
| 1                 | (±)-Indoxacarb          | 218 → 203                 | 10          | 218 → 134                 | 20          | 0.995 | 0.14          | 0.51          |
| 2                 | Bendiocarb              | 166 → 151                 | 10          | 166 → 109                 | 20          | 1.000 | 0.02          | 0.04          |
| 3                 | Carbaryl                | 144 → 115                 | 20          | 115 → 89                  | 20          | 0.996 | 0.08          | 0.21          |
| 4                 | Carbofuran              | 164 → 149                 | 15          | 164 → 103                 | 20          | 0.996 | 0.05          | 0.11          |
| 5                 | Carbophenothion         | 157 → 121                 | 20          | 157 → 77                  | 20          | 0.998 | 0.05          | 0.15          |
| 6                 | Diethofencarb           | 267 → 225                 | 10          | 267 → 168                 | 20          | 0.994 | 0.04          | 0.12          |
| 7                 | Ethiofencarb            | 168 → 107                 | 10          | 168 → 77                  | 25          | 0.997 | 0.08          | 0.23          |
| 8                 | Furathiocarb            | 194 → 105                 | 20          | 194 → 165                 | 15          | 0.980 | 0.10          | 0.29          |
| 9                 | Phenoxycarb             | 116 → 88                  | 15          | 186 → 109                 | 15          | 0.990 | 0.15          | 0.56          |
| 10                | Pirimicarb              | 238 → 166                 | 10          | 206 → 166                 | 15          | 0.998 | 0.04          | 0.14          |
| 11                | Mecarbam                | 296 → 196                 | 10          | 296 → 168                 | 10          | 0.992 | 1.14          | 4.21          |
| 12                | Azoxystrobin            | 344 → 329                 | 20          | 344 → 183                 | 20          | 0.989 | 0.06          | 0.2           |
| 13                | Boscalid                | 342 → 140                 | 10          | 342 → 112                 | 25          | 0.987 | 0.13          | 0.42          |
| 14                | Bupirimate              | 208 → 165                 | 15          | 108 → 140                 | 15          | 0.994 | 0.93          | 3.61          |
| 15                | Captafol                | 151 → 79                  | 20          | 151 → 122                 | 10          | 1.000 | 0.03          | 0.09          |
| 16                | Captan                  | 107 → 79                  | 10          | 107 → 77                  | 20          | 0.986 | 1.32          | 4.37          |
| 17                | Cyproconazole isomer II | 222 → 125                 | 20          | 224 → 127                 | 20          | 0.998 | 0.06          | 0.17          |
| 18                | Diclobutrazol           | 270 → 159                 | 10          | 270 → 137                 | 25          | 0.955 | 0.12          | 0.38          |
| 19                | Fenarimol               | 251 → 139                 | 20          | 251 → 111                 | 25          | 0.985 | 0.32          | 1.05          |
| 20                | Fenhexamid              | 177 → 78                  | 20          | 177 → 113                 | 20          | 0.922 | 2.54          | 8.38          |
| 21                | Fluodioxonil            | 248 → 127                 | 20          | 248 → 154                 | 25          | 0.972 | 0.42          | 1.31          |
| 22                | Flusilazole             | 233 → 165                 | 20          | 233 → 152                 | 20          | 0.980 | 2.55          | 8.36          |
| 23                | Imazalil                | 215 → 173                 | 15          | 215 → 145                 | 25          | 0.989 | 0.26          | 0.86          |
| 24                | Kresoxim methyl         | 206 → 131                 | 10          | 206 → 116                 | 10          | 0.990 | 1.38          | 4.23          |
| 25                | Metalaxyl-M             | 160 → 130                 | 20          | 160 → 144                 | 20          | 0.995 | 2.32          | 8.22          |
| 26                | Mepronil                | 269 → 119                 | 10          | 210 → 181                 | 20          | 0.992 | 0.07          | 0.23          |
| 27                | Penconazole             | 248 → 157                 | 20          | 248 → 192                 | 20          | 0.992 | 0.41          | 1.22          |
| 28                | Prochloraz              | 180 → 138                 | 15          | 180 → 69                  | 20          | 0.982 | 0.82          | 2.92          |

| No. | Compound              | Transition 1<br>( <i>m/z</i> ) | CE 1<br>(V) | Transition 2<br>( <i>m/z</i> ) | CE 2<br>(V) | <i>R</i> <sup>2</sup> | LOD<br>(ng/g) | LOQ<br>(ng/g) |
|-----|-----------------------|--------------------------------|-------------|--------------------------------|-------------|-----------------------|---------------|---------------|
| 29  | Procymidone           | 283 → 96                       | 10          | 285 → 96                       | 15          | 0.996                 | 0.13          | 0.48          |
| 30  | Pyrimethanil          | 198 → 118                      | 30          | 199 → 198                      | 25          | 0.986                 | 0.25          | 0.82          |
| 31  | Quintozen             | 237 → 143                      | 20          | 237 → 119                      | 20          | 1.000                 | 0.12          | 0.36          |
| 32  | Tebuconazole          | 250 → 125                      | 15          | 125 → 89                       | 25          | 0.999                 | 0.15          | 0.47          |
| 33  | Tolchlophos methyl    | 265 → 250                      | 20          | 265 → 93                       | 24          | 0.972                 | 0.35          | 1.17          |
| 34  | Triadimefon           | 208 → 181                      | 10          | 208 → 127                      | 15          | 0.994                 | 0.11          | 0.34          |
| 35  | Trifloxystrobin       | 190 → 130                      | 15          | 190 → 102                      | 25          | 0.992                 | 0.31          | 0.99          |
| 36  | Vinclozolin           | 212 → 177                      | 15          | 212 → 145                      | 20          | 0.998                 | 2.45          | 8.24          |
| 37  | Amandryn              | 227 → 170                      | 10          | 227 → 185                      | 10          | 0.994                 | 2.49          | 8.18          |
| 38  | Atrazine              | 200 → 122                      | 15          | 215 → 200                      | 10          | 0.996                 | 0.12          | 0.4           |
| 39  | Diflufenican          | 266 → 183                      | 25          | 246 → 218                      | 25          | 0.999                 | 5.09          | 14.5          |
| 40  | Linuron               | 160 → 133                      | 15          | 160 → 125                      | 15          | 0.984                 | 5.51          | 19.3          |
| 41  | Methabenzthiazuron    | 164 → 136                      | 15          | 127 → 109                      | 20          | 0.992                 | 4.85          | 15.8          |
| 42  | Oxyfluorfen           | 300 → 223                      | 20          | 252 → 170                      | 25          | 0.978                 | 0.32          | 1.29          |
| 43  | Propazine             | 214 → 172                      | 15          | 214 → 94                       | 20          | 0.952                 | 0.54          | 1.62          |
| 44  | Propyzamide           | 173 → 145                      | 15          | 173 → 109                      | 25          | 0.999                 | 0.11          | 0.33          |
| 45  | Simazine              | 201 → 173                      | 7           | 201 → 186                      | 8           | 0.998                 | 0.05          | 0.17          |
| 46  | Terbuthilazine        | 214 → 104                      | 15          | 214 → 132                      | 10          | 1.000                 | 0.12          | 0.38          |
| 47  | Trifluralin           | 264 → 160                      | 15          | 264 → 206                      | 10          | 0.961                 | 5.11          | 17.08         |
| 48  | Buprofezin            | 175 → 132                      | 15          | 175 → 117                      | 20          | 0.989                 | 0.18          | 0.65          |
| 49  | Cyromazine            | 151 → 109                      | 15          | 165 → 123                      | 20          | 0.999                 | 0.06          | 0.18          |
| 50  | Pyriproxyfen          | 136 → 78                       | 20          | 136 → 96                       | 20          | 0.990                 | 0.16          | 0.54          |
| 51  | 2,4'-DDD              | 235 → 165                      | 20          | 237 → 165                      | 20          | 0.996                 | 0.09          | 0.31          |
| 52  | 2,4'-DDE              | 246 → 176                      | 20          | 318 → 248                      | 20          | 0.962                 | 0.52          | 1.62          |
| 53  | 2,4'-DDT              | 235 → 165                      | 20          | 237 → 165                      | 20          | 0.996                 | 0.21          | 0.65          |
| 54  | 4,4'-DDD              | 235 → 165                      | 20          | 237 → 165                      | 20          | 0.998                 | 0.09          | 0.29          |
| 55  | 4,4'-DDE              | 246 → 176                      | 30          | 318 → 248                      | 30          | 0.996                 | 0.16          | 0.55          |
| 56  | 4,4'-DDT              | 235 → 165                      | 20          | 237 → 165                      | 20          | 0.998                 | 2.33          | 8.23          |
| 57  | Alachlor              | 188 → 160                      | 15          | 161 → 146                      | 15          | 0.985                 | 0.26          | 0.95          |
| 58  | Aldrin                | 263 → 193                      | 20          | 293 → 258                      | 20          | 0.986                 | 0.82          | 2.85          |
| 59  | <i>cis</i> -Chlordane | 373 → 266                      | 20          | 373 → 264                      | 20          | 0.992                 | 0.19          | 0.62          |
| 60  | Dicofol               | 250 → 139                      | 20          | 250 → 215                      | 10          | 0.998                 | 0.12          | 0.36          |
| 61  | Dieldrin              | 263 → 193                      | 20          | 263 → 228                      | 20          | 0.996                 | 0.12          | 0.53          |
| 62  | Endosulfan sulfate    | 272 → 237                      | 15          | 274 → 239                      | 15          | 0.998                 | 0.09          | 0.31          |

| No. | Compound                      | Transition 1<br>( <i>m/z</i> ) | CE 1<br>(V) | Transition 2<br>( <i>m/z</i> ) | CE 2<br>(V) | <i>R</i> <sup>2</sup> | LOD<br>(ng/g) | LOQ<br>(ng/g) |
|-----|-------------------------------|--------------------------------|-------------|--------------------------------|-------------|-----------------------|---------------|---------------|
| 63  | Endosulfan $\alpha$           | 241 $\rightarrow$ 206          | 25          | 241 $\rightarrow$ 170          | 25          | 0.998                 | 0.15          | 0.46          |
| 64  | Endosulfan $\beta$            | 195 $\rightarrow$ 160          | 10          | 195 $\rightarrow$ 125          | 20          | 1.000                 | 0.07          | 0.23          |
| 65  | Endrin                        | 263 $\rightarrow$ 193          | 20          | 281 $\rightarrow$ 245          | 15          | 0.972                 | 0.09          | 0.29          |
| 66  | Methoxychlor                  | 227 $\rightarrow$ 169          | 20          | 227 $\rightarrow$ 141          | 25          | 0.978                 | 0.12          | 0.38          |
| 67  | <i>trans</i> -Chlordane       | 373 $\rightarrow$ 266          | 20          | 373 $\rightarrow$ 264          | 20          | 0.980                 | 0.14          | 0.42          |
| 68  | $\alpha$ -HCH                 | 181 $\rightarrow$ 145          | 10          | 219 $\rightarrow$ 183          | 10          | 0.985                 | 0.04          | 0.14          |
| 69  | $\beta$ -HCH                  | 181 $\rightarrow$ 145          | 15          | 219 $\rightarrow$ 183          | 10          | 0.986                 | 0.28          | 0.94          |
| 70  | $\gamma$ -HCH                 | 181 $\rightarrow$ 145          | 15          | 219 $\rightarrow$ 183          | 10          | 0.998                 | 0.12          | 0.42          |
| 71  | Acephate                      | 136 $\rightarrow$ 94           | 10          | 136 $\rightarrow$ 119          | 8           | 0.987                 | 0.35          | 1.13          |
| 72  | Andhion                       | 231 $\rightarrow$ 175          | 15          | 231 $\rightarrow$ 129          | 20          | 0.969                 | 0.36          | 1.15          |
| 73  | Azinphos ethyl                | 160 $\rightarrow$ 132          | 5           | 160 $\rightarrow$ 77           | 10          | 0.999                 | 0.29          | 0.91          |
| 74  | Chlorpyrifos                  | 197 $\rightarrow$ 169          | 15          | 197 $\rightarrow$ 169          | 15          | 0.996                 | 1.68          | 6.04          |
| 75  | Chlorpyrifos methyl           | 286 $\rightarrow$ 93           | 25          | 286 $\rightarrow$ 271          | 20          | 0.984                 | 0.76          | 2.64          |
| 76  | <i>cis</i> -Chlorfenvinphos   | 267 $\rightarrow$ 159          | 20          | 269 $\rightarrow$ 161          | 20          | 0.999                 | 0.08          | 0.27          |
| 77  | Coumaphos                     | 226 $\rightarrow$ 163          | 20          | 226 $\rightarrow$ 135          | 25          | 0.984                 | 0.29          | 0.92          |
| 78  | Diazinon                      | 137 $\rightarrow$ 84           | 15          | 179 $\rightarrow$ 137          | 20          | 0.992                 | 0.09          | 0.28          |
| 79  | Dimethoate                    | 125 $\rightarrow$ 79           | 20          | 125 $\rightarrow$ 79           | 8           | 0.999                 | 0.11          | 0.35          |
| 80  | Fenamiphos                    | 303 $\rightarrow$ 154          | 15          | 303 $\rightarrow$ 195          | 10          | 0.986                 | 0.09          | 0.29          |
| 81  | Fenchlorphos                  | 285 $\rightarrow$ 270          | 20          | 285 $\rightarrow$ 240          | 20          | 0.998                 | 0.07          | 0.21          |
| 82  | Fenitrothion                  | 125 $\rightarrow$ 79           | 15          | 277 $\rightarrow$ 125          | 18          | 0.990                 | 0.07          | 0.23          |
| 83  | Fenthion                      | 278 $\rightarrow$ 109          | 20          | 278 $\rightarrow$ 125          | 22          | 0.998                 | 0.19          | 0.58          |
| 84  | Fenthion Sulfone              | 310 $\rightarrow$ 105          | 20          | 310 $\rightarrow$ 109          | 30          | 0.970                 | 0.69          | 2.55          |
| 85  | Fenthion Sulfoxide            | 278 $\rightarrow$ 109          | 15          | 278 $\rightarrow$ 169          | 25          | 0.995                 | 0.04          | 0.13          |
| 86  | Malathion                     | 173 $\rightarrow$ 99           | 15          | 173 $\rightarrow$ 117          | 15          | 0.992                 | 0.09          | 0.28          |
| 87  | Methidathion                  | 145 $\rightarrow$ 85           | 10          | 145 $\rightarrow$ 58           | 20          | 1.000                 | 0.07          | 0.20          |
| 88  | Omethoate                     | 156 $\rightarrow$ 110          | 10          | 156 $\rightarrow$ 79           | 30          | 0.994                 | 0.12          | 0.35          |
| 89  | Parathion methyl              | 263 $\rightarrow$ 109          | 15          | 263 $\rightarrow$ 246          | 6           | 0.999                 | 0.06          | 0.16          |
| 90  | Phenthoate                    | 274 $\rightarrow$ 125          | 15          | 274 $\rightarrow$ 121          | 15          | 1.000                 | 0.11          | 0.30          |
| 91  | Phosalone                     | 182 $\rightarrow$ 111          | 20          | 182 $\rightarrow$ 75           | 30          | 0.997                 | 0.04          | 0.10          |
| 92  | Phosmet                       | 160 $\rightarrow$ 77           | 25          | 160 $\rightarrow$ 133          | 15          | 1.000                 | 0.04          | 0.10          |
| 93  | Phoxim                        | 109 $\rightarrow$ 81           | 15          | 109 $\rightarrow$ 91           | 15          | 0.998                 | 0.10          | 0.29          |
| 94  | Quinalphos                    | 146 $\rightarrow$ 118          | 15          | 146 $\rightarrow$ 91           | 30          | 0.999                 | 0.07          | 0.18          |
| 95  | <i>trans</i> -Chlorfenvinphos | 267 $\rightarrow$ 159          | 20          | 269 $\rightarrow$ 161          | 20          | 1.000                 | 0.11          | 0.29          |
| 96  | Triphenyl phosphate           | 325 $\rightarrow$ 169          | 20          | 325 $\rightarrow$ 77           | 25          | 0.997                 | 0.13          | 0.30          |

| No.         | Compound                  | Transition 1<br>( <i>m/z</i> ) | CE 1<br>(V) | Transition 2<br>( <i>m/z</i> ) | CE 2<br>(V) | <i>R</i> <sup>2</sup> | LOD<br>(ng/g) | LOQ<br>(ng/g) |
|-------------|---------------------------|--------------------------------|-------------|--------------------------------|-------------|-----------------------|---------------|---------------|
| 97          | Carbophenothion           | 157 → 121                      | 20          | 157 → 77                       | 20          | 1.000                 | 0.11          | 0.37          |
| 98          | Pirimiphos-methyl         | 290 → 125                      | 15          | 290 → 151                      | 15          | 0.998                 | 0.14          | 0.46          |
| 99          | <i>cis</i> -Fluvalinate   | 250 → 55                       | 15          | 252 → 55                       | 20          | 0.990                 | 0.39          | 1.18          |
| 100         | <i>cis</i> -Permethrin    | 183 → 153                      | 15          | 183 → 168                      | 15          | 0.994                 | 0.52          | 1.76          |
| 101         | Cypermethrin isomer I     | 181 → 152                      | 20          | 163 → 91                       | 15          | 0.992                 | 0.08          | 0.26          |
| 102         | Cypermethrin isomer II    | 181 → 152                      | 20          | 163 → 91                       | 15          | 1.000                 | 0.1           | 0.3           |
| 103         | Cypermethrin isomer III   | 181 → 152                      | 20          | 163 → 91                       | 15          | 0.999                 | 0.05          | 0.14          |
| 104         | Deltamethrin              | 181 → 152                      | 20          | 253 → 93                       | 15          | 0.999                 | 0.1           | 0.33          |
| 105         | <i>trans</i> -Fluvalinate | 250 → 55                       | 15          | 252 → 55                       | 20          | 0.994                 | 0.1           | 0.32          |
| 106         | <i>trans</i> -Permethrin  | 183 → 153                      | 20          | 183 → 168                      | 20          | 0.986                 | 0.09          | 0.29          |
| 107         | Λ-Cyhalothrin             | 181 → 152                      | 25          | 197 → 141                      | 10          | 0.988                 | 0.11          | 0.37          |
| 108         | Piperonyl butoxide        | 176 → 131                      | 15          | 176 → 103                      | 20          | 1.000                 | 0.06          | 0.18          |
| <b>PCBs</b> |                           |                                |             |                                |             |                       |               |               |
| 1           | PCB28                     | 256 → 186                      | 15          | 258 → 186                      | 15          | 0.999                 | 0.12          | 0.38          |
| 2           | PCB52                     | 290 → 220                      | 15          | 292 → 222                      | 15          | 0.999                 | 0.09          | 0.30          |
| 3           | PCB77                     | 290 → 220                      | 20          | 292 → 222                      | 20          | 1.000                 | 0.08          | 0.22          |
| 4           | PCB81                     | 290 → 220                      | 20          | 292 → 222                      | 20          | 1.000                 | 0.08          | 0.24          |
| 5           | PCB101                    | 324 → 254                      | 20          | 326 → 256                      | 20          | 0.996                 | 0.06          | 0.22          |
| 6           | PCB105                    | 324 → 254                      | 20          | 326 → 256                      | 20          | 0.989                 | 0.12          | 0.35          |
| 7           | PCB114                    | 324 → 254                      | 20          | 326 → 256                      | 20          | 0.996                 | 0.14          | 0.49          |
| 8           | PCB118                    | 324 → 254                      | 20          | 326 → 256                      | 20          | 0.999                 | 0.09          | 0.32          |
| 9           | PCB123                    | 324 → 254                      | 20          | 326 → 256                      | 20          | 0.998                 | 0.08          | 0.24          |
| 10          | PCB126                    | 324 → 254                      | 20          | 326 → 256                      | 20          | 0.982                 | 0.34          | 1.15          |
| 11          | PCB138                    | 360 → 290                      | 25          | 362 → 292                      | 25          | 0.982                 | 0.13          | 0.46          |
| 12          | PCB153                    | 360 → 290                      | 25          | 362 → 292                      | 25          | 1.000                 | 0.24          | 0.92          |
| 13          | PCB156                    | 360 → 290                      | 30          | 362 → 292                      | 30          | 1.000                 | 0.06          | 0.19          |
| 14          | PCB157                    | 360 → 290                      | 30          | 362 → 292                      | 30          | 0.978                 | 0.74          | 2.75          |
| 15          | PCB167                    | 360 → 290                      | 30          | 362 → 292                      | 30          | 0.996                 | 0.33          | 1.13          |
| 16          | PCB169                    | 360 → 290                      | 30          | 362 → 292                      | 30          | 0.996                 | 0.14          | 0.34          |
| 17          | PCB180                    | 394 → 324                      | 20          | 396 → 326                      | 20          | 0.992                 | 0.15          | 0.52          |
| 18          | PCB189                    | 394 → 324                      | 25          | 396 → 326                      | 25          | 0.998                 | 0.04          | 0.14          |
| <b>PAHs</b> |                           |                                |             |                                |             |                       |               |               |
| 1           | Acenaphthylene            | 152 → 126                      | 30          | 152 → 102                      | 30          | 0.990                 | 0.11          | 0.24          |
| 2           | Anthracene                | 178 → 152                      | 25          | 176 → 150                      | 25          | 0.990                 | 0.13          | 0.38          |

| No. | Compound               | Transition 1<br>( <i>m/z</i> ) | CE 1<br>(V) | Transition 2<br>( <i>m/z</i> ) | CE 2<br>(V) | <i>R</i> <sup>2</sup> | LOD<br>(ng/g) | LOQ<br>(ng/g) |
|-----|------------------------|--------------------------------|-------------|--------------------------------|-------------|-----------------------|---------------|---------------|
| 3   | Benzo[a]anthracene     | 228 → 226                      | 30          | 228 → 202                      | 20          | 0.994                 | 0.12          | 0.41          |
| 4   | Benzo[a]pyrene         | 252 → 250                      | 35          | 252 → 226                      | 20          | 0.996                 | 0.09          | 0.28          |
| 5   | Benzo[b]fluoranthene   | 252 → 250                      | 35          | 126 → 113                      | 10          | 0.990                 | 0.28          | 0.86          |
| 6   | Benzo[g,h,i]perylene   | 276 → 274                      | 45          | 276 → 272                      | 50          | 1.000                 | 0.1           | 0.31          |
| 7   | Benzo[k]fluoranthene   | 252 → 250                      | 35          | 126 → 113                      | 10          | 0.994                 | 0.17          | 0.48          |
| 8   | Chrysene               | 228 → 226                      | 30          | 228 → 202                      | 20          | 0.990                 | 0.1           | 0.34          |
| 9   | Dibenzo[a,h]anthracene | 278 → 276                      | 30          | 278 → 252                      | 20          | 1.000                 | 0.11          | 0.32          |
| 10  | Fluorene               | 166 → 165                      | 15          | 165 → 164                      | 20          | 0.996                 | 0.12          | 0.42          |
| 11  | Indeno[1,2,3-cd]pyrene | 276 → 274                      | 30          | 137 → 136                      | 15          | 0.997                 | 0.09          | 0.38          |
| 12  | Phenanthrene           | 178 → 152                      | 25          | 176 → 150                      | 25          | 0.999                 | 2.42          | 8.02          |
| 13  | Pyrene                 | 202 → 200                      | 20          | 202 → 152                      | 30          | 0.996                 | 2.38          | 8.21          |

**Table S2.** Main figures of merit of analytical validation and monitored ions for investigated plasticizers, including  $n=10$  PAEs and  $n=8$  NPPs.  $R^2$ , coefficient of determination; LOD, Limit of Detection; LOQ, Limit of Quantification.

| No.         | Compound                       | Abbreviation | Monitored ions (m/z)  | $R^2$ | LOD (mg/Kg) | LOQ (mg/Kg) |
|-------------|--------------------------------|--------------|-----------------------|-------|-------------|-------------|
| <i>PAEs</i> |                                |              |                       |       |             |             |
| 1           | Dimethyl Phthalate             | DMP          | <u>163</u> , 92, 164  | 0.995 | 0.007       | 0.023       |
| 2           | Diethyl Phthalate              | DEP          | <u>149</u> , 177, 176 | 0.992 | 0.005       | 0.017       |
| 3           | Dipropyl Phthalate             | DPrP         | <u>149</u> , 150, 209 | 0.993 | 0.007       | 0.020       |
| 4           | Dibutyl Phthalate              | DBP          | <u>149</u> , 150, 223 | 0.994 | 0.007       | 0.023       |
| 5           | Diisobutyl Phthalate           | DiBP         | <u>149</u> , 150, 223 | 0.992 | 0.007       | 0.023       |
| 6           | Butyl Benzyl Phthalate         | BBP          | <u>149</u> , 91, 206  | 0.988 | 0.037       | 0.121       |
| 7           | Diphenyl Phthalate             | DPhP         | <u>225</u> , 226, 104 | 0.994 | 0.015       | 0.051       |
| 8           | Dicyclohexyl Phthalate         | DcHexP       | <u>149</u> , 167, 150 | 0.998 | 0.027       | 0.087       |
| 9           | Diheptyl Phthalate             | DHepP        | <u>149</u> , 99, 265  | 0.995 | 0.177       | 0.553       |
| 10          | Di(2-ethylhexyl) Phthalate     | DEHP         | <u>149</u> , 167, 279 | 0.998 | 0.007       | 0.020       |
| <i>NPPs</i> |                                |              |                       |       |             |             |
| 1           | Dimethyl Adipate               | DMA          | <u>114</u> , 101, 111 | 0.996 | 0.010       | 0.030       |
| 2           | Diethyl Adipate                | DEA          | <u>111</u> , 157, 128 | 0.994 | 0.013       | 0.037       |
| 3           | Benzyl Benzoate                | BB           | <u>105</u> , 91, 212  | 0.989 | 0.012       | 0.033       |
| 4           | Dibutyl Adipate                | DBA          | <u>129</u> , 185, 111 | 0.985 | 0.023       | 0.068       |
| 5           | Diisobutyl Adipate             | DiBA         | <u>129</u> , 185, 111 | 0.995 | 0.008       | 0.027       |
| 6           | Di(2-ethylhexyl) adipate       | DEHA         | <u>129</u> , 112, 147 | 0.986 | 0.013       | 0.037       |
| 7           | Di(2-ethylhexyl) terephthalate | DEHT         | <u>149</u> , 112, 261 | 0.988 | 0.070       | 0.233       |
| 8           | Di(2-ethylhexyl) sebacate      | DEHS         | <u>185</u> , 149, 112 | 0.993 | 0.018       | 0.053       |

Underlined ions were considered for quantitative analysis

**Table S3.** Optimized MRM transitions and parameters of analytical validation for  $n=9$  BPs under analysis.  $R^2$ , coefficient of determination; LOD, Limit of Detection; LOQ, Limit of Quantification

| No. | Compound                                     | Abbreviat<br>ion | Transition 1<br>Quantifier ion<br>( $m/z$ ) | CE 1<br>(V) | Transition 2<br>Qualifier ion<br>( $m/z$ ) | CE 2<br>(V) | $R^2$  | LOD<br>(ng/g) | LOQ<br>(ng/g) |
|-----|----------------------------------------------|------------------|---------------------------------------------|-------------|--------------------------------------------|-------------|--------|---------------|---------------|
| 1   | 4,4'-Sulfonyldiphenol                        | BPS              | 249.27 $\rightarrow$ 107.9                  | 25          | 249.27 $\rightarrow$ 92.0                  | 30          | 0.9993 | 0.30          | 1.0           |
| 2   | 4,4'-Methylenediphenol                       | BPF              | 199.23 $\rightarrow$ 93.1                   | 15          | 199.23 $\rightarrow$ 105.1                 | 25          | 0.9911 | 0.45          | 1.5           |
| 3   | 1,1-Bis(4-hydroxyphenyl) ethane              | BPE              | 213.26 $\rightarrow$ 198.0                  | 20          | 213.26 $\rightarrow$ 176.9                 | 30          | 0.9931 | 0.30          | 1.0           |
| 4   | 4,4'-(propan-2,2-diyl) diphenol              | BPA              | 227.29 $\rightarrow$ 212.1                  | 10          | 227.29 $\rightarrow$ 133.0                 | 20          | 0.9907 | 0.45          | 1.5           |
| 5   | 4-[2-(4-hydroxyphenyl) butan-2-yl] phenol    | BPB              | 241.31 $\rightarrow$ 212.0                  | 20          | 241.31 $\rightarrow$ 211.0                 | 15          | 0.9944 | 0.30          | 1.0           |
| 6   | 2,2-Bis(4-hydroxyphenyl) hexafluoropropane   | BPAF             | 335.30 $\rightarrow$ 265.0                  | 30          | 335.30 $\rightarrow$ 177.0                 | 20          | 0.9995 | 0.30          | 1.0           |
| 7   | 1,1-Bis(4-hydroxyphenyl)-1-phenyl-ethane     | BPAP             | 289.36 $\rightarrow$ 274.1                  | 35          | 289.36 $\rightarrow$ 211.0                 | 25          | 0.9954 | 0.45          | 1.5           |
| 8   | 1,1-Bis(4-hydroxyphenyl)-cyclohexane         | BPZ              | 267.30 $\rightarrow$ 145.0                  | 15          | 267.30 $\rightarrow$ 222.9                 | 30          | 0.9984 | 0.45          | 1.5           |
| 9   | 1,4-Bis(2-(4-hydroxyphenyl)-2-propyl)benzene | BPP              | 345.46 $\rightarrow$ 330.1                  | 25          | 345.46 $\rightarrow$ 314.9                 | 10          | 0.9992 | 0.45          | 1.5           |

**Table S4.** Main figures of merit of analytical validation for  $n=15$  inorganic elements under analysis.  $R^2$ , coefficient of determination; LOD, Limit of Detection; LOQ, Limit of Quantification.

| No. | Inorganic<br>element | $R^2$  | LOD<br>( $\mu\text{g/kg}$ ) | LOQ<br>( $\mu\text{g/kg}$ ) |
|-----|----------------------|--------|-----------------------------|-----------------------------|
| 1   | Na                   | 0.9978 | 1.533                       | 5.059                       |
| 2   | Mg                   | 0.9990 | 0.433                       | 1.429                       |
| 3   | K                    | 0.9980 | 0.501                       | 1.653                       |
| 4   | Ca                   | 0.9981 | 1.322                       | 4.363                       |
| 5   | Mn                   | 0.9998 | 0.003                       | 0.010                       |
| 6   | Fe                   | 0.9996 | 0.015                       | 0.050                       |
| 7   | Co                   | 0.9997 | 0.001                       | 0.003                       |
| 8   | Ni                   | 0.9997 | 0.007                       | 0.023                       |
| 9   | Cu                   | 0.9994 | 0.005                       | 0.017                       |
| 10  | Zn                   | 0.9993 | 0.038                       | 0.125                       |
| 11  | Cr                   | 0.9995 | 0.007                       | 0.023                       |
| 12  | Al                   | 0.9993 | 0.067                       | 0.221                       |
| 13  | As                   | 0.9998 | 0.001                       | 0.003                       |
| 14  | Cd                   | 0.9999 | 0.001                       | 0.003                       |
| 15  | Pb                   | 0.9999 | 0.001                       | 0.003                       |

**Table S5.** Daily intake limits and Oral Reference Dose (mg/Kg<sub>bw</sub>/day) for each element. TDI: Tolerable Daily Intake; TWI: Tolerable Daily Intake; BMDL01: Benchmark dose at 1% level of extra risk (lower confidence level); BMDL05: Benchmark dose at 5% level of extra risk (lower confidence level).

| Contaminant | Adequate intake<br>(mg/Kg <sub>bw</sub> /day) | Guideline value and reference | RfD<br>(mg/Kg <sub>bw</sub> /day) | Reference |
|-------------|-----------------------------------------------|-------------------------------|-----------------------------------|-----------|
| <b>DEHP</b> | 0.05                                          | TDI [1]                       | 0.02                              | [8]       |
| <b>DEP</b>  | 5                                             | TDI [1]                       | 0.8                               |           |
| <b>DBP</b>  | 0.01                                          | TDI [1]                       | 0.1                               |           |
| <b>DEHA</b> | 0.30                                          | TDI [2]                       | 0.6                               |           |
| <b>BPA*</b> | 4                                             | TDI [3]                       | 0.05                              |           |
| <b>Al</b>   | 1                                             | TWI [4]                       | 0.1                               |           |
| <b>Ni</b>   | 22                                            | TDI [5]                       | 0.02                              |           |
| <b>Pb</b>   | 0.5                                           | BMDL01 [6]                    | 0.0035                            |           |
| <b>As*</b>  | 3                                             | BMDL05 [7]                    | 0.0003                            |           |

\*Expressed as µg/Kg<sub>bw</sub>/day
